# Supplementary material for: Efficient star-shaped hole transporting materials with diphenylethenyl side arms for an efficient perovskite solar cell
Source: Royal Society of Chemistry journal article supplement (doi:10.1039/c4ta04179h), 2014-09-24

## Supporting Information

### Efficient Star-Shaped Hole Transporting Materials with Diphenylethenyl Side Arms for an Efficient Perovskite Solar Cell

Hyeju Choi,<sup>a</sup> Sojin Park,<sup>a</sup> Sanghyun Paek,<sup>a</sup> Piyasiri Ekanayake,<sup>b</sup> Mohammad Khaja Nazeeruddin,<sup>c</sup>  
Jaejung Ko<sup>a,\*</sup>

<sup>a</sup> Department of Advanced Material Chemistry, Korea University, 2511, Sejong-ro, Sejong City 339-700, Republic of Korea. Fax: 82-44-860-1331; Tel: 82-44-860-1337; E-mail: jko@korea.ac.kr

<sup>b</sup> Applied Physics Program, Faculty of Science, University of Brunei Darussalam, Jalan Tungku Link, Gadong BE 1410, BRUNEI DARUSSALAM.

<sup>c</sup> Laboratory of Photonics and Interfaces, Department of Chemistry and Chemical Engineering, Swiss Federal Institute of Technology, Station 6, CH-1015 Lausanne, Switzerland.

#### Contents

|                                                                                     |   |
|-------------------------------------------------------------------------------------|---|
| Figure S1. Electrochemical characterization of HTMs                                 | 2 |
| Figure S2. Space charge limitation of current $J$ - $V$ characteristics of the HTMs | 3 |
| Figure S3. Histogram of the solar cell efficiencies obtained from HTMs              | 4 |
| Figure S4. Photocurrent-voltage characteristics with different scan directions      | 5 |
| Figure S5. Photocurrent-voltage characteristics without additives                   | 6 |
| Figure S6. LHE spectra of HTMs                                                      | 7 |

**Figure S1.** Electrochemical characterization of the **TPA-MeOPh** and **FA-MeOPh** in dichloromethane /  $(n\text{-C}_4\text{H}_9)_4\text{NPF}_6$  (0.1 M), scan speed 100 mV/s, potentials vs.  $\text{Fc}/\text{Fc}^+$ .

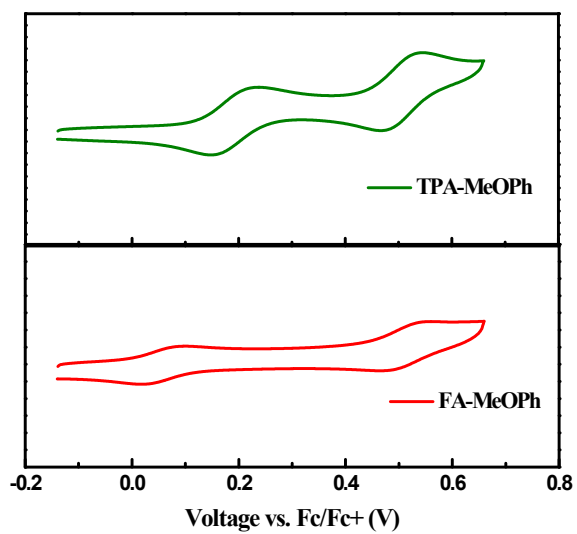

**Figure S2.** Space charge limitation of current  $J$ - $V$  characteristics of the HTMs.

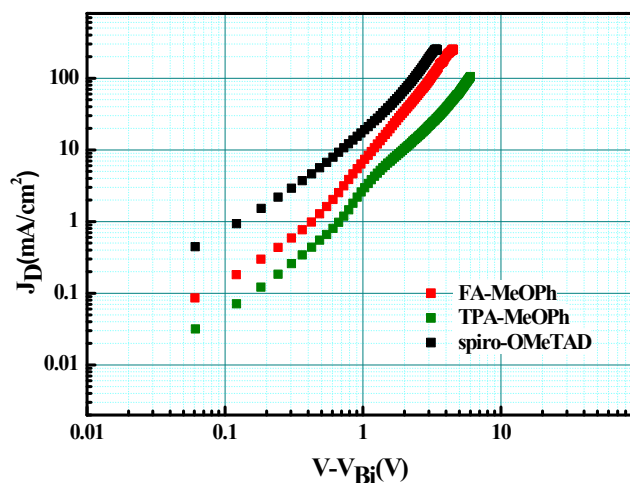

**Space Charge Limitation of Current (SCLC).** The hole mobility was investigated from the SCLC  $J$ - $V$  characteristics obtained in the dark for hole-only devices. ITO/PEDOT:PSS/HTMs /Au devices as a function of the bias corrected by the built-in voltage determined from the difference in work function between Au and the HOMO level of HTMs. The *SCLC* behavior in the trap-free region can be characterized using the Mott-Gurney square law (1).

$$J = (9/8)\epsilon\mu(V^2/L^3) \quad (1)$$

where  $\epsilon$  is the static dielectric constant of the medium and  $\mu$  is carrier mobility.

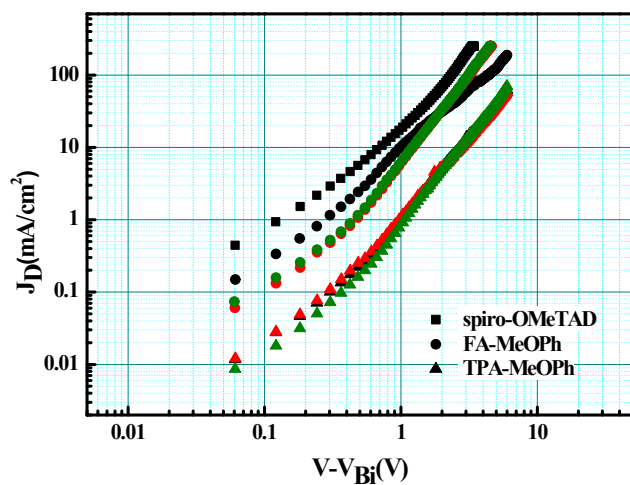

**Figure S3.** Histogram of the solar cell efficiencies obtained from the (a) **TPA-MeOPh** and (b) **FA-MeOPh** based hybrid solar cells.

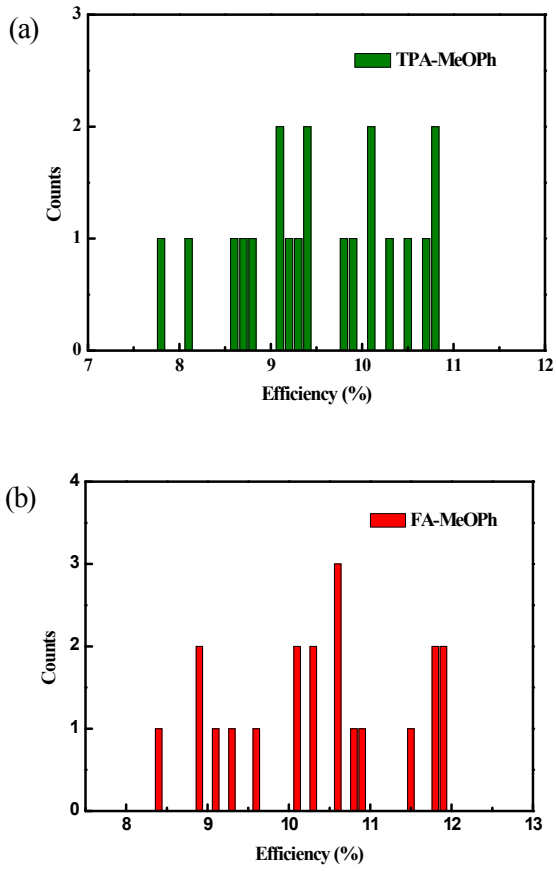

|           |         | $J_{sc}$ (mAcm <sup>-2</sup> ) | $V_{oc}$ (V) | $ff$  | $\eta$ (%) |
|-----------|---------|--------------------------------|--------------|-------|------------|
| TPA-MeOPh | best    | 17.33                          | 0.994        | 0.627 | 10.79      |
|           | average | 16.16                          | 1.001        | 0.616 | 9.94       |
| FA-MeOPh  | best    | 18.39                          | 0.924        | 0.698 | 11.86      |
|           | average | 17.02                          | 0.934        | 0.675 | 10.85      |

**Figure S4.** Photocurrent-voltage ( $J$ - $V$ ) characteristics of the solar cells with (a) **FA-MeOPh** (●), (b) **TPA-MeOPh** (▲) under AM 1.5 conditions ( $100 \text{ mW/cm}^2$ ) with different scan directions.

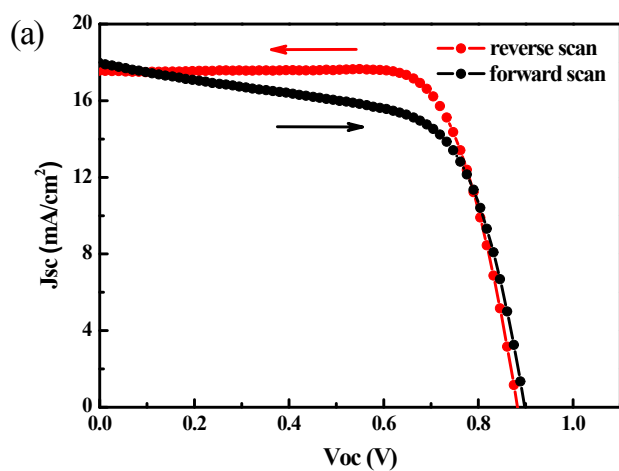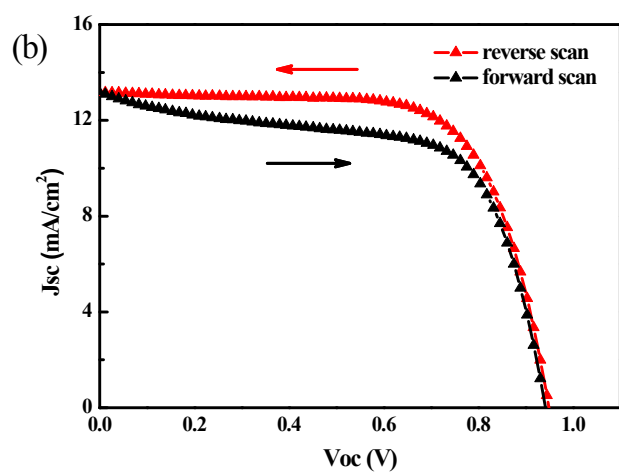

|           |         | $J_{sc}$ ( $\text{mAcm}^{-2}$ ) | $V_{oc}$ (V) | $ff$  | $\eta$ (%) |
|-----------|---------|---------------------------------|--------------|-------|------------|
| FA-MeOPh  | reverse | 17.55                           | 0.883        | 0.741 | 11.48      |
|           | forward | 17.98                           | 0.898        | 0.634 | 10.24      |
| TPA-MeOPh | reverse | 13.18                           | 0.949        | 0.690 | 8.63       |
|           | forward | 13.19                           | 0.942        | 0.634 | 7.88       |

**Figure S5.** Photocurrent-voltage ( $J$ - $V$ ) characteristics of the solar cells with (a) **FA-MeOPh** (●), (b) **TPA-MeOPh** (▲) under AM 1.5 conditions (100 mW/cm<sup>2</sup>) without any additives.

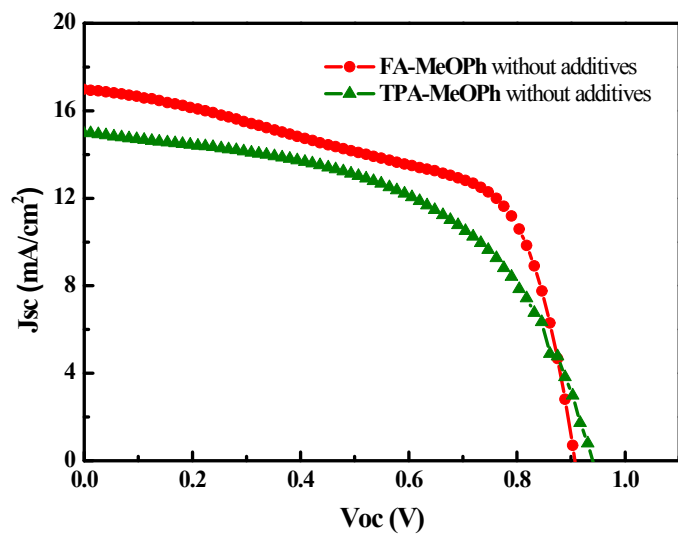

Figure S6. LHE spectra of FA-MeOPh (●) and TPA-MeOPh (▲).

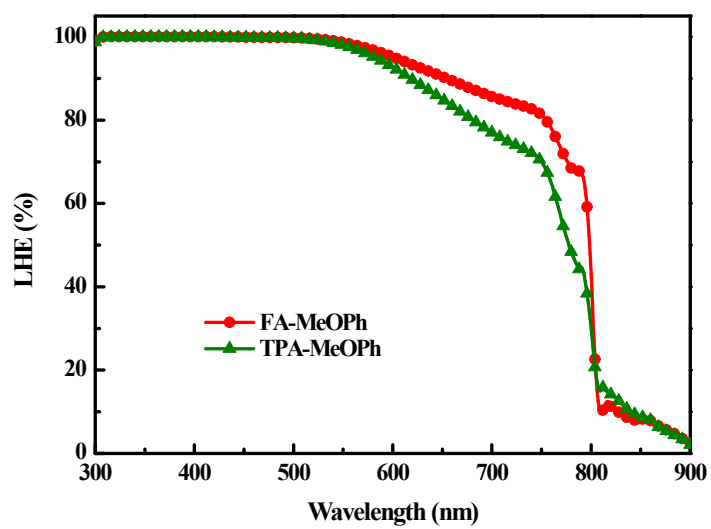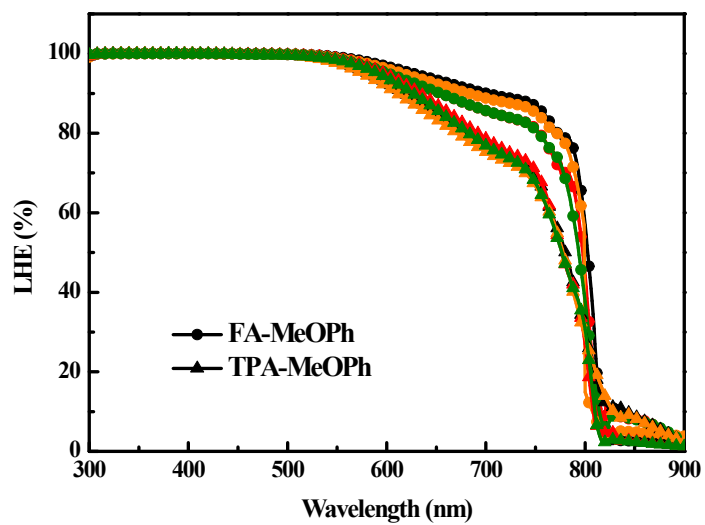

Supplement: c4ta04179h1.pdf [file c4ta04179h1.pdf]
